# Supplementary material for: Identification and analysis of long non-coding RNAs that are involved in inflammatory process in response to transmissible gastroenteritis virus infection
Source: BMC Genomics. 2019 Nov 4;20:806. doi: 10.1186/s12864-019-6156-5 (PMC6829948; doi:10.1186/s12864-019-6156-5)
Supplement: Supplementary file 6 — Additional file 6: Table S6. The lncRNA-proteins regulation network. [file 12864_2019_6156_MOESM6_ESM.xlsx]

## Sheet: Sheet1
Table S6 | The lncRNA-proteins regulation network
LncRNA ID	Protein (gene name)
TCONS_00000113	ID4
TCONS_00000113	IRF1
TCONS_00000113	KLF9
TCONS_00000113	MYC
TCONS_00000113	NEFM
TCONS_00000113	QKI
TCONS_00000113	RNASET2
TCONS_00000113	RXRG
TCONS_00000113	SARM1
TCONS_00000113	VIM
TCONS_00001996	TBRG4
TCONS_00001996	KDM5C
TCONS_00001996	KLF9
TCONS_00001996	MYH2
TCONS_00001996	NEFM
TCONS_00001996	RNASET2
TCONS_00001996	SARM1
TCONS_00001996	VIM
TCONS_00002283	DDX39B
TCONS_00002283	ID2
TCONS_00002283	KDM5C
TCONS_00002283	KLF9
TCONS_00002283	NEFM
TCONS_00002283	QKI
TCONS_00002283	RNASET2
TCONS_00002283	VIM
TCONS_00006193	DES
TCONS_00006193	NEFM
TCONS_00006193	RXRG
TCONS_00006193	VIM
TCONS_00007229	KLF9
TCONS_00007229	QKI
TCONS_00007229	RNASET2
TCONS_00007229	SARM1
TCONS_00007267	NEFL
TCONS_00007272	IRF1
TCONS_00007272	NEFM
TCONS_00007272	QKI
TCONS_00007272	RXRG
TCONS_00007272	SARM1
TCONS_00007272	SFTPD
TCONS_00007785	DDX4
TCONS_00007795	KLF9
TCONS_00007795	NEFM
TCONS_00007795	RXRG
TCONS_00007903	ID4
TCONS_00007903	KLF9
TCONS_00007903	MYH2
TCONS_00007903	NEFM
TCONS_00007903	VIM
TCONS_00007904	ID4
TCONS_00007904	KLF9
TCONS_00007904	MYH2
TCONS_00007904	NEFM
TCONS_00007904	VIM
TCONS_00008962	C7
TCONS_00008962	ID4
TCONS_00008962	KDM5C
TCONS_00008962	KLF9
TCONS_00008962	NEFM
TCONS_00008962	RNASET2
TCONS_00008962	RXRG
TCONS_00008962	VIM
TCONS_00008966	NEFM
TCONS_00008966	RNASET2
TCONS_00008966	RXRG
TCONS_00008966	SARM1
TCONS_00010615	FBN1
TCONS_00010615	ID2
TCONS_00010615	QKI
TCONS_00010615	SARM1
TCONS_00010710	C7
TCONS_00010710	ID2
TCONS_00010710	KLF9
TCONS_00010710	NEFM
TCONS_00011024	IRF1
TCONS_00011024	KDM5C
TCONS_00011024	MYH2
TCONS_00013753	ID2
TCONS_00013753	KDM5C
TCONS_00013753	MYH2
TCONS_00013753	QKI
TCONS_00013753	RNASET2
TCONS_00014072	KLF9
TCONS_00014072	NEFM
TCONS_00014072	RXRG
TCONS_00015252	NEFM
TCONS_00015252	RNASET2
TCONS_00015252	RXRG
TCONS_00015252	VIM
TCONS_00015307	QKI
TCONS_00015926	DDX39B
TCONS_00015926	ID4
TCONS_00015926	IRF1
TCONS_00015926	KDM5C
TCONS_00015926	MYC
TCONS_00015926	MYH2
TCONS_00015926	NEFM
TCONS_00015926	QKI
TCONS_00015926	RXRG
TCONS_00015926	VIM
TCONS_00016861	NEFL
TCONS_00019226	DES
TCONS_00019226	FBN1
TCONS_00019226	NEFM
TCONS_00019226	RXRG
TCONS_00019226	VIM
TCONS_00019227	ID4
TCONS_00019227	KDM5C
TCONS_00019227	KLF9
TCONS_00019227	NEFM
TCONS_00019227	RXRG
TCONS_00019227	SARM1
TCONS_00019484	C7
TCONS_00019484	QKI
TCONS_00019484	SARM1
TCONS_00020964	ID2
TCONS_00020964	KLF9
TCONS_00021136	SARM1
TCONS_00021915	ID2
TCONS_00021915	ID4
TCONS_00021915	IRF1
TCONS_00021915	KDM5C
TCONS_00021915	KLF9
TCONS_00021915	MYC
TCONS_00021915	NEFM
TCONS_00021915	TP53
TCONS_00021915	QKI
TCONS_00021915	RNASET2
TCONS_00021915	SARM1
TCONS_00021915	SFTPD
TCONS_00021915	VIM
TCONS_00021916	DDX4
TCONS_00021916	DDX39B
TCONS_00021916	ID2
TCONS_00021916	ID4
TCONS_00021916	IRF1
TCONS_00021916	KDM5C
TCONS_00021916	KLF9
TCONS_00021916	MYC
TCONS_00021916	NEFM
TCONS_00021916	TP53
TCONS_00021916	QKI
TCONS_00021916	RNASET2
TCONS_00021916	RXRG
TCONS_00021916	SARM1
TCONS_00021916	SFTPD
TCONS_00021916	VIM
TCONS_00025812	ID4
TCONS_00025812	TP53
TCONS_00026983	ID4
TCONS_00026983	KLF9
TCONS_00026983	NEFM
TCONS_00026983	RNASET2
TCONS_00026983	RXRG
TCONS_00026983	VIM
TCONS_00027377	NEFM
TCONS_00027377	RXRG
TCONS_00027377	VIM
TCONS_00031206	KLF9
TCONS_00031206	QKI
TCONS_00031596	QKI
TCONS_00032200	DDX4
TCONS_00032200	IRF1
TCONS_00032200	NEFM
TCONS_00032200	TP53
TCONS_00032200	QKI
TCONS_00032200	SARM1
TCONS_00032200	VIM
TCONS_00033242	NEFM
TCONS_00033242	RXRG
TCONS_00033242	VIM
TCONS_00033391	ID4
TCONS_00033391	KLF9
TCONS_00033396	ID2
TCONS_00033396	MYH2
TCONS_00035735	FBN1
TCONS_00035735	ID2
TCONS_00035735	IRF1
TCONS_00035735	KLF9
TCONS_00035735	QKI
TCONS_00035735	RNASET2
TCONS_00035735	SARM1
TCONS_00036124	ID2
TCONS_00036124	KLF9
TCONS_00036124	NEFM
TCONS_00036124	QKI
TCONS_00036124	VIM
TCONS_00036213	DES
TCONS_00036213	RXRG
TCONS_00036213	VIM
TCONS_00036295	NEFL
TCONS_00037709	ID2
TCONS_00037709	KLF9
TCONS_00037709	NEFM
TCONS_00037709	TP53
TCONS_00037709	QKI
TCONS_00037709	RXRG
TCONS_00038909	FBN1
TCONS_00039379	ID2
TCONS_00039379	IRF1
TCONS_00039379	KDM5C
TCONS_00039379	KLF9
TCONS_00039379	QKI
TCONS_00039379	SARM1
TCONS_00039484	NEFL
TCONS_00040958	ID2
TCONS_00041093	FBN1
TCONS_00041093	QKI
TCONS_00041093	SARM1
TCONS_00041094	QKI
TCONS_00041094	SARM1
TCONS_00041678	QKI
TCONS_00041678	SARM1
TCONS_00043105	C7
TCONS_00043105	IRF1
TCONS_00043105	KDM5C
TCONS_00043114	ID4
TCONS_00043114	KLF9
TCONS_00043114	NEFM
TCONS_00043114	RNASET2
TCONS_00043150	ID2
TCONS_00043150	ID4
TCONS_00043150	KDM5C
TCONS_00043150	KLF9
TCONS_00043150	NEFM
TCONS_00043150	TP53
TCONS_00043150	QKI
TCONS_00043150	RXRG
TCONS_00043150	SARM1
TCONS_00043156	C7
TCONS_00043156	ID4
TCONS_00043156	NEFM
TCONS_00043156	RXRG
TCONS_00043156	SARM1
TCONS_00043156	VIM
TCONS_00043977	NEFM
TCONS_00043977	QKI
TCONS_00043977	RXRG
TCONS_00043977	SARM1
TCONS_00044759	FGF7
TCONS_00044759	KLF9
TCONS_00044759	QKI
TCONS_00044759	RNASET2
TCONS_00045591	C7
TCONS_00045591	KLF9
TCONS_00045591	MYC
TCONS_00045591	QKI
TCONS_00045591	RNASET2
TCONS_00045592	KLF9
TCONS_00045592	MYC
TCONS_00045592	NEFM
TCONS_00045592	QKI
TCONS_00045592	RNASET2
TCONS_00047080	C7
TCONS_00047080	QKI
TCONS_00047169	QKI
TCONS_00047726	FBN1
TCONS_00047728	FBN1
TCONS_00049177	FBN1
TCONS_00049177	IRF1
TCONS_00049177	KDM5C
TCONS_00049177	KLF9
TCONS_00049177	NEFM
TCONS_00049177	RXRG
TCONS_00049177	SARM1
TCONS_00051102	SNRPE
TCONS_00051422	MYH2
TCONS_00051422	QKI
TCONS_00052757	IRF1
TCONS_00052757	TP53
TCONS_00052757	QKI
TCONS_00052757	SARM1
TCONS_00052757	TXNRD1
TCONS_00053174	SARM1
TCONS_00054202	QKI
TCONS_00054202	SFTPD
TCONS_00054612	DES
TCONS_00054612	ID2
TCONS_00054612	ID4
TCONS_00054612	KLF9
TCONS_00054612	NEFM
TCONS_00054612	RXRG
TCONS_00054612	SFTPD
TCONS_00054612	VIM
TCONS_00054612	WT1
TCONS_00055426	ID2
TCONS_00055426	MYH2
TCONS_00055426	QKI
TCONS_00055426	SARM1
TCONS_00057780	MYH2
TCONS_00059793	SNRPE
TCONS_00059817	FBN1
TCONS_00059817	NEFM
TCONS_00059817	RXRG
TCONS_00059817	VIM
TCONS_00060807	ID2
TCONS_00060807	KDM5C
TCONS_00060807	KLF9
TCONS_00060807	QKI
TCONS_00060807	SARM1
TCONS_00061354	DES
TCONS_00061354	DDX39B
TCONS_00061354	FGF7
TCONS_00061354	ID2
TCONS_00061354	ID4
TCONS_00061354	IRF1
TCONS_00061354	KDM5C
TCONS_00061354	KLF9
TCONS_00061354	MYC
TCONS_00061354	NEFM
TCONS_00061354	RXRG
TCONS_00061354	VIM
TCONS_00064392	DDX4
TCONS_00064392	SARM1
TCONS_00064461	KLF9
TCONS_00064461	NEFM
TCONS_00064461	RXRG
TCONS_00064461	VIM
TCONS_00064739	NEFM
TCONS_00065414	QKI
TCONS_00065414	SARM1
TCONS_00065865	DES
TCONS_00065865	NEFM
TCONS_00065865	RXRG
TCONS_00065865	VIM
TCONS_00066402	DDX39B
TCONS_00066402	FBN1
TCONS_00066402	ID2
TCONS_00066402	KDM5C
TCONS_00066402	KLF9
TCONS_00066402	MYC
TCONS_00066402	NEFM
TCONS_00066402	TP53
TCONS_00066402	QKI
TCONS_00066402	SARM1
TCONS_00066403	KLF9
TCONS_00066403	QKI
TCONS_00066403	SFTPD
TCONS_00067143	MYH2
TCONS_00067143	NEFM
TCONS_00067143	TP53
TCONS_00067976	ID4
TCONS_00067976	KLF9
TCONS_00067976	NEFM
TCONS_00067976	QKI
TCONS_00067976	RXRG
TCONS_00067976	SARM1
TCONS_00067979	ID4
TCONS_00067979	KLF9
TCONS_00067979	NEFM
TCONS_00067979	QKI
TCONS_00067979	RNASET2
TCONS_00067979	RXRG
TCONS_00067979	SARM1
TCONS_00068662	ID2
TCONS_00068662	IRF1
TCONS_00068662	KDM5C
TCONS_00068662	KLF9
TCONS_00068662	NEFM
TCONS_00068662	QKI
TCONS_00068662	RNASET2
TCONS_00068662	SARM1
TCONS_00068663	DES
TCONS_00068663	ID2
TCONS_00068663	IRF1
TCONS_00068663	KDM5C
TCONS_00068663	KLF9
TCONS_00068663	QKI
TCONS_00068663	RNASET2
TCONS_00068663	SARM1
TCONS_00072090	SARM1

## Sheet: Sheet2
ID4	sp_Q06AV5_ID4_PIG
IRF1	sp_A0FIN4_IRF1_PIG
KLF9	sp_P79288_KLF9_PIG
MYC	sp_I3L5V6_SARM1_PIG
NEFM	sp_Q0GFF6_RXRG_PIG
QKI	sp_P02543_VIME_PIG
RNASET2	sp_Q7M329_RNT2_PIG
RXRG	sp_P08552_NFM_PIG
SARM1	sp_Q29031_MYC_PIG
VIM	sp_Q5W9D5_QKI_PIG
TBRG4	sp_A1YVX4_KDM5C_PIG
KDM5C	sp_Q9TV63_MYH2_PIG
MYH2	sp_Q7YS91_FAKD4_PIG
DDX39B	sp_Q29024_DX39B_PIG
ID2	sp_Q2VIU1_ID2_PIG
DES	sp_P02540_DESM_PIG
NEFL	sp_P02547_NFL_PIG
SFTPD	sp_Q9N1X4_SFTPD_PIG
DDX4	sp_Q6GWX0_DDX4_PIG
C7	sp_Q9TUQ3_CO7_PIG
FBN1	sp_Q9TV36_FBN1_PIG
TP53	sp_A1YVX4_KDM5C
FGF7	sp_Q9TUB2_P53_PIG
SNRPE	sp_Q9N198_FGF7_PIG
TXNRD1	sp_A1XQR9_RUXE_PIG
WT1	sp_Q9MYY8_TRXR1_PIG
	sp_O62651_WT1_PIG
	DX39B_CAEEL
	SWAP_CAEEL
	DIM1_CAEEL
	YOT2_CAEEL
